# Supplementary material for: Extracellular vesicles secreted by highly metastatic clonal variants of osteosarcoma preferentially localize to the lungs and induce metastatic behaviour in poorly metastatic clones
Source: PubMed Central journal article supplement (PMC5190045; doi:10.18632/oncotarget.9781), 2016-06-02
Supplement: oncotarget-07-43570-s001.pdf [file oncotarget-07-43570-s001.pdf]

## Extracellular vesicles secreted by highly metastatic clonal variants of osteosarcoma preferentially localize to the lungs and induce metastatic behaviour in poorly metastatic clones

### Supplementary Materials

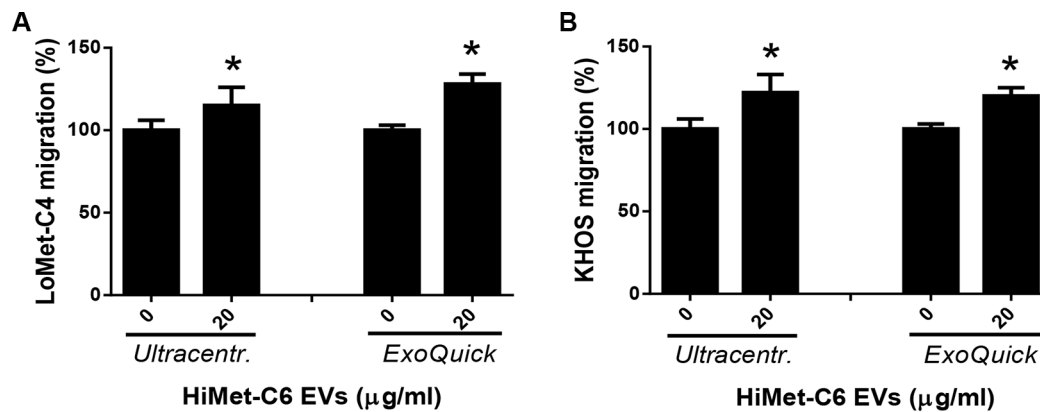

**Supplementary Figure S1: Extracellular vesicles purified by ultracentrifugation or ExoQuick are functionally similar.** EVs were isolated from serum free and EV-free media derived from HiMet-C6 clones by ultracentrifugation (Ultracentr.) or ExoQuick TC Exosome Precipitation Solution (System Biosciences) (ExoQuick). Migration of LoMet-C4 clones (**A**) or parental KHOS cells (**B**) was estimated in the presence of no EVs (0) or 20 μg/ml EVs (20). Data presented as mean ± SEM from triplicate determinations of 3 independent experiments. \* $P < 0.05$  from ANOVA.

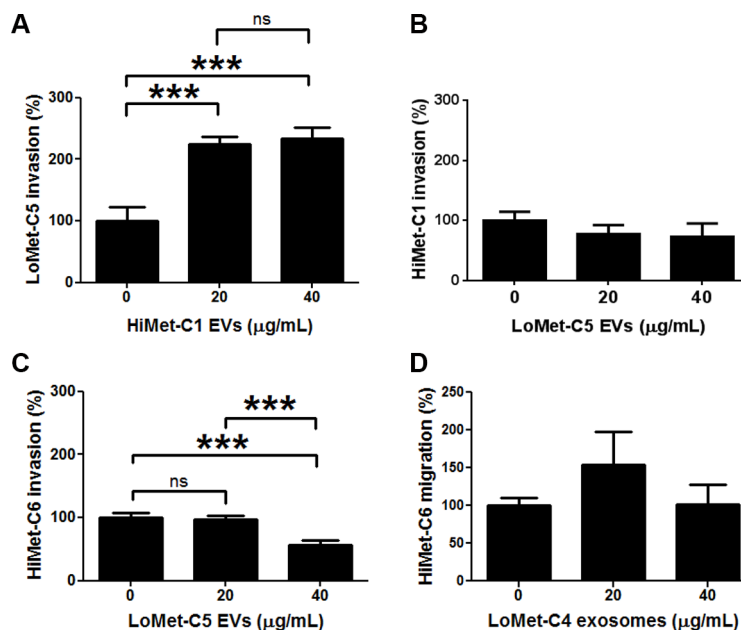

**Supplementary Figure S2: Extracellular vesicles secreted by LoMet clonal variants do not increase migration or invasion of HiMet clonal variants.** (A) Increase in the invasion of LoMet clonal variant C5 in the presence of EVs secreted by HiMet clonal variant C1. \*1-way ANOVA ( $F = 102$ ,  $P < 0.0001$ ), Tukey's MCT for  $P < 0.05$ . (B, C, D) EVs secreted by LoMet EVs (C4, C5) do not increase migration or invasion of HiMet clonal variants (C1, C6). Statistical analysis: (B) 1-way ANOVA ( $F = 3.58$ ,  $P = 0.055$ ), Tukey's MCT for  $P < 0.05 = ns$ ; (C) 1-way ANOVA ( $F = 15.8$ ,  $P = 0.0003$ ), Tukey's MCT for  $P < 0.05$ . (D) 1-way ANOVA ( $F = 0.99$ ,  $P = 0.397$ ), Tukey's MCT for  $P < 0.05 = ns$ . Experiments were performed in triplicate at least twice. Bars: SD.

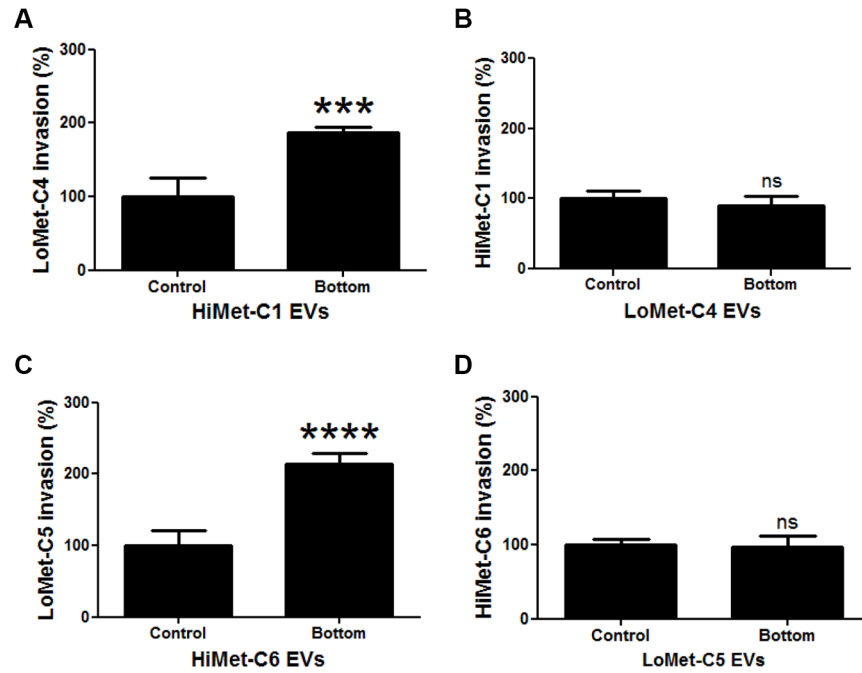

**Supplementary Figure S3: Chemotactic properties of HiMet EVs.** (A) Increase in the migration of LoMet-C4 in response to HiMet-C1 EV chemotaxis. \*\*\* $P = 0.0003$ . (B) LoMet-C4 EVs do not induce an increase in the migration of HiMet-C1 cells by chemotaxis. (C) Increase in the invasion of LoMet-C5 in response to HiMet-C6 EV chemotaxis. \*\*\*\* $P < 0.0001$ . (D) LoMet-C5 EVs do not induce a response in invasion by HiMet-C6 cells by chemotaxis. Experiments were performed in triplicate at least twice. Two-tailed  $P$  value from an unpaired  $t$  test. Bars: SD.

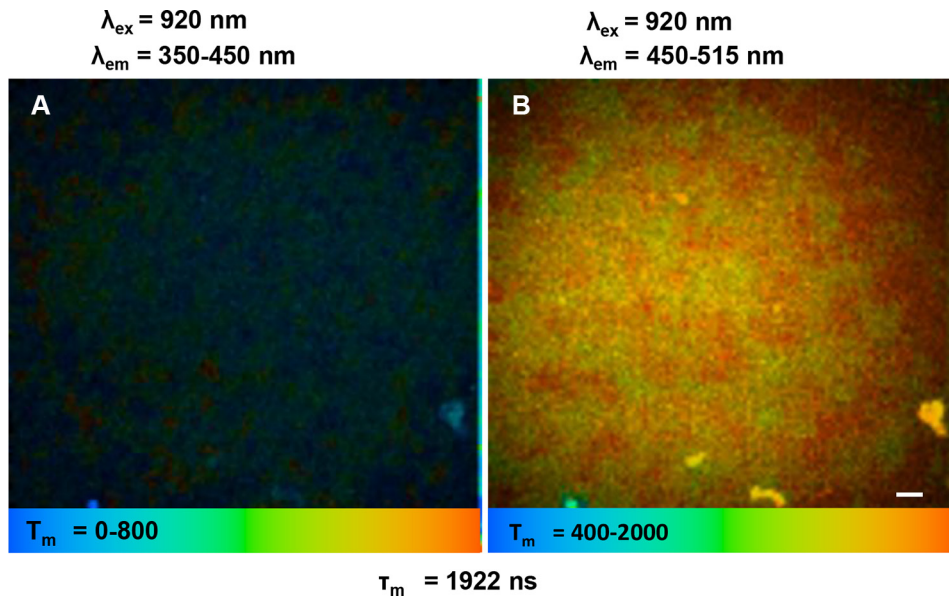

**Supplementary Figure S4: MPM-FLIM images of PKH67-labelled HiMet-C6 EVs in PBS.** (A) Pseudocolored  $\tau_m$  fluorescence lifetime image (0–800 ps; blue-green-red) recorded at  $\lambda_{exc}/\lambda_{em}$ : 920/350 to 450 nm. (B) Pseudocolored  $\tau_m$  fluorescence lifetime image (400–2000 ps; blue-green-red) recorded at  $\lambda_{exc}/\lambda_{em}$ : 920/450 to 515 nm. Magnification: 40 $\times$ . Scale bar: 40  $\mu\text{m}$ .

**Supplementary Table S1: Proteomic analysis of HiMet-C6 EVs**

| Accession No. | Symbol UniProtKB | Entry Name                                             | Ave. Total Intensity |
|---------------|------------------|--------------------------------------------------------|----------------------|
| P62263        | RPS14            | 40S ribosomal protein S14                              | 1.60E + 05           |
| P62249        | RPS16            | 40S ribosomal protein S16                              | 1.20E + 06           |
| P15880        | RPS2             | 40S ribosomal protein S2                               | 4.52E + 05           |
| P62701        | RPS4X            | 40S ribosomal protein S4, X isoform                    | 2.46E + 05           |
| Q8NHW5 P05388 | RPLP0P6          | 60S acidic ribosomal protein P0-like                   | 2.28E + 05           |
| P50914        | RPL14            | 60S ribosomal protein L14                              | 5.72E + 04           |
| Q02878        | RPL6             | 60S ribosomal protein L6                               | 1.82E + 05           |
| P63261        | ACTG1            | Actin, cytoplasmic 2                                   | 2.25E + 07           |
| P01023 P20742 | A2M              | Alpha-2-macroglobulin                                  | 1.52E + 08           |
| O43707 P12814 | ACTN4            | Alpha-actinin-4                                        | 4.35E + 05           |
| P02771        | AFP              | Alpha-fetoprotein                                      | 3.01E + 06           |
| P04083        | ANXA1            | Annexin A1                                             | 1.55E + 05           |
| P07355 A6NMY6 | ANXA2            | Annexin A2                                             | 9.25E + 05           |
| P02647        | APOA1            | Apolipoprotein A-I                                     | 9.60E + 05           |
| P04114        | APOB             | Apolipoprotein B-100                                   | 2.91E + 07           |
| P53396        | ACLY             | ATP-citrate synthase                                   | 8.33E + 04           |
| Q00610        | CLTC             | Clathrin heavy chain 1                                 | 7.23E + 05           |
| P12259        | F5               | Coagulation factor V                                   | 3.68E + 04           |
| P12109        | COL6A1           | Collagen alpha-1(VI) chain                             | 2.71E + 06           |
| P12110        | COL6A2           | Collagen alpha-2(VI) chain                             | 6.53E + 05           |
| Q9BXJ4        | C1QTNF3          | Complement C1q tumor necrosis factor-related protein 3 | 9.07E + 05           |
| P01024        | C3               | Complement C3                                          | 3.18E + 07           |
| P0C0L4 P0C0L5 | C4A              | Complement C4-A                                        | 2.20E + 07           |
| Q9Y240        | CLEC11A          | C-type lectin domain family 11 member A                | 1.87E + 05           |
| Q5VTE0 P68104 | EEF1A1P5         | Elongation factor 1-alpha 1                            | 4.77E + 06           |
| O00303        | EIF3F            | Eukaryotic translation initiation factor 3 subunit F   | 1.39E + 05           |
| P49327        | FASN             | Fatty acid synthase                                    | 4.76E + 05           |
| P02751        | FN1              | Fibronectin                                            | 4.01E + 06           |
| P23142        | FBLN1            | Fibulin-1                                              | 4.36E + 06           |
| P06396        | GSN              | Gelsolin                                               | 2.92E + 05           |
| P04406        | GAPDH            | Glyceraldehyde-3-phosphate dehydrogenase               | 3.47E + 06           |
| P07900 P08238 | HSP90            | Heat shock protein HSP 90-alpha                        | 3.50E + 06           |
| P69905        | HBA1             | Hemoglobin subunit alpha                               | 1.99E + 07           |
| P02100 P69891 | HBE1             | Hemoglobin subunit epsilon                             | 2.14E + 07           |
| P07910 B7ZW38 | HNRNPC           | Heterogeneous nuclear ribonucleoproteins C1/C2         | 5.06E + 05           |
| P04908 Q7L7L0 | HIST1H2AB        | Histone H2A type 1-B/E                                 | 4.63E + 06           |
| Q99879 Q99880 | HIST1H2BM        | Histone H2B type 1-M                                   | 2.12E + 06           |
| Q71DI3        | HIST2H3A         | Histone H3.2                                           | 2.70E + 06           |
| P62805        | HIST1H4A         | Histone H4                                             | 6.43E + 06           |
| Q06033        | ITI3             | Inter-alpha-trypsin inhibitor heavy chain H3           | 1.71E + 06           |
| P04264 P35908 | KRT1             | Keratin, type II cytoskeletal 1                        | 1.05E + 06           |
| P51884        | LUM              | Lumican                                                | 6.50E + 05           |
| P22234        | PAICS            | Multifunctional protein ADE2                           | 3.05E + 05           |
| P35580 P35579 | MYH10            | Myosin-10                                              | 4.17E + 05           |
| P06748        | NPM1             | Nucleophosmin                                          | 1.63E + 06           |

|               |               |                                       |            |
|---------------|---------------|---------------------------------------|------------|
| P36955        | PEDF/SERPINF1 | Pigment epithelium-derived factor     | 1.43E + 06 |
| P00747        | PLG           | Plasminogen                           | 4.33E + 06 |
| P60900        | PSMA6         | Proteasome subunit alpha type-6       | 1.03E + 06 |
| P0DME0 Q01105 | SETSIP        | Protein SETSIP                        | 3.28E + 05 |
| P00734        | F2            | Prothrombin                           | 1.49E + 06 |
| P14618        | PKM           | Pyruvate kinase PKM                   | 4.38E + 05 |
| P02768        | ALB           | Serum albumin                         | 1.91E + 08 |
| P62314        | SNRPD1        | Small nuclear ribonucleoprotein Sm D1 | 1.88E + 05 |
| P78371        | CCT2          | T-complex protein 1 subunit beta      | 1.42E + 06 |
| P50991        | CCT4          | T-complex protein 1 subunit delta     | 7.71E + 05 |
| P50990        | CCT8          | T-complex protein 1 subunit theta     | 1.40E + 06 |
| P40227        | CCT6A         | T-complex protein 1 subunit zeta      | 2.61E + 05 |
| P07996        | THBS1         | Thrombospondin-1                      | 8.23E + 06 |
| P35443 P49747 | THBS4         | Thrombospondin-4                      | 4.08E + 05 |
| P05543        | SERPINA7      | Thyroxine-binding globulin            | 5.76E + 05 |
| P55072        | VCP           | Valosin containing protein            | 2.76E + 05 |
| P68363 Q9NY65 | TUBA1B        | Tubulin alpha-1B chain                | 3.06E + 06 |
| P08670        | VIM           | Vimentin                              | 8.65E + 05 |
| P04004        | VTN           | Vitronectin                           | 6.68E + 05 |

Proteins expressed in at least 2 of 3 biological replicates analysed in 3 independent runs.

### Supplementary Table S2: Proteomic analysis of LoMet-C4 EVs

| Accession No. | Symbol UniProtKB | Entry Name                                             | Ave. Total Intensity |
|---------------|------------------|--------------------------------------------------------|----------------------|
| Q15008        | PSMD6            | 26S proteasome non-ATPase regulatory subunit 6         | 3.00E + 05           |
| P61313        | RPL15            | 60S ribosomal protein L15                              | 7.21E + 04           |
| P63261 P60709 | ACTG1            | Actin, cytoplasmic 2                                   | 1.95E + 07           |
| P01023 P20742 | A2M              | Alpha-2-macroglobulin                                  | 7.86E + 07           |
| P02771        | AFP              | Alpha-fetoprotein                                      | 1.09E + 06           |
| P07355 A6NMY6 | ANXA2            | Annexin A2                                             | 1.49E + 06           |
| P02647        | APOA1            | Apolipoprotein A-I                                     | 1.14E + 06           |
| P04114        | APOB             | Apolipoprotein B-100                                   | 4.15E + 07           |
| P12109        | COL6A1           | Collagen alpha-1(VI) chain                             | 3.83E + 06           |
| P12111        | COL6A3           | Collagen alpha-3(VI) chain                             | 1.74E + 05           |
| Q9BXJ4        | C1QTNF3          | Complement C1q tumor necrosis factor-related protein 3 | 8.97E + 05           |
| P01024        | C3               | Complement C3                                          | 2.10E + 07           |
| P0C0L4 P0C0L5 | C4A              | Complement C4-A                                        | 2.68E + 07           |
| P08603        | CFH              | Complement factor H                                    | 2.25E + 06           |
| Q5VTE0 P68104 | EEF1A1P5         | Elongation factor 1-alpha 1                            | 2.85E + 06           |
| P49327        | FASN             | Fatty acid synthase                                    | 6.68E + 05           |
| P02751        | FN1              | Fibronectin                                            | 4.08E + 06           |
| P23142        | FBLN1            | Fibulin-1                                              | 5.85E + 06           |
| P06396        | GSN              | Gelsolin                                               | 2.60E + 05           |
| P04406        | GAPDH            | Glyceraldehyde-3-phosphate dehydrogenase               | 1.31E + 06           |
| P07900 P08238 | HSP90            | Heat shock protein HSP 90-alpha                        | 2.81E + 06           |
| P69905        | HBA1             | Hemoglobin subunit alpha                               | 9.54E + 06           |
| P02100 P69891 | HBE1             | Hemoglobin subunit epsilon                             | 1.58E + 07           |
| P04908 Q7L7L0 | HIST1H2AB        | Histone H2A type 1-B/E                                 | 1.30E + 06           |

|               |               |                                              |            |
|---------------|---------------|----------------------------------------------|------------|
| P62805        | HIST1H4A      | Histone H4                                   | 5.77E + 05 |
| Q06033        | ITI1H3        | Inter-alpha-trypsin inhibitor heavy chain H3 | 4.71E + 05 |
| P04264        | KRT1          | Keratin, type II cytoskeletal 1              | 7.16E + 05 |
| P51884        | LUM           | Lumican                                      | 3.38E + 05 |
| P36955        | PEDF/SERPINF1 | Pigment epithelium-derived factor            | 2.70E + 05 |
| P00747        | PLG           | Plasminogen                                  | 6.20E + 06 |
| P60900        | PSMA6         | Proteasome subunit alpha type-6              | 5.23E + 05 |
| P00734        | F2            | Prothrombin                                  | 9.00E + 05 |
| P02768        | ALB           | Serum albumin                                | 1.56E + 08 |
| P07996        | THBS1         | Thrombospondin-1                             | 4.23E + 06 |
| P35443 P49747 | THBS4         | Thrombospondin-4                             | 4.64E + 05 |
| P68363 P68366 | TUBA1B        | Tubulin alpha-1B chain                       | 3.26E + 06 |
| P04004        | VTN           | Vitronectin                                  | 9.95E + 05 |

Proteins abundant in at least 2 of 3 biological replicates analysed in three independent runs.

### Supplementary Table S3: Proteins in HiMet-C6 EVs grouped according to biological process

| GO – Biological process                                                                             | UniProtKB | Symbol    | Name                                                 | Subcellular localization                   |
|-----------------------------------------------------------------------------------------------------|-----------|-----------|------------------------------------------------------|--------------------------------------------|
| Vesicle trafficking, fusion, exocytosis, endocytosis, cellular transport                            | O43707    | ACTN4     | Alpha-actinin 4                                      | Nucleus, cytoplasm                         |
|                                                                                                     | P04083    | ANXA1     | Annexin A1                                           | Nucleus, cytoplasm                         |
|                                                                                                     | P78371    | CCT2      | T-complex protein 1 subunit beta                     | Cytoplasm                                  |
|                                                                                                     | P50991    | CCT4      | T-complex protein 1 subunit delta                    | Cytoplasm                                  |
|                                                                                                     | P40227    | CCT6A     | T-complex protein 1 subunit zeta                     | Cytoplasm                                  |
|                                                                                                     | P50990    | CCT8      | T-complex protein 1 subunit theta                    | Cytoplasm                                  |
|                                                                                                     | Q00610    | CLTC      | Clathrin heavy chain 1                               | Cytoplasm                                  |
|                                                                                                     | P69905    | HBA1      | Hemoglobin subunit alpha                             | Cytosol                                    |
|                                                                                                     | P55072    | VCP       | Vasolin containing protein                           | Cytoplasm, ER                              |
|                                                                                                     | P05543    | SERPINA7  | Thyroxine-binding globulin                           | Secreted, extracellular exosome            |
| Transcription regulation, DNA repair, DNA replication, chromosomal stability, nucleosome remodeling | O00303    | EIF3F     | Eukaryotic translation initiation factor 3 subunit F | Cytoplasm                                  |
|                                                                                                     | P04908    | HIST1H2AB | Histone H2A type 1-B/E                               | Nucleus                                    |
|                                                                                                     | Q99879    | HIST1H2BM | Histone H2B type 1-M                                 | Nucleus                                    |
|                                                                                                     | P62805    | HIST1H4A  | Histone H4                                           | Nucleus                                    |
|                                                                                                     | Q71DI3    | HIST2H3A  | Histone H3.2                                         | Nucleus                                    |
|                                                                                                     | P07910    | HNRNPC    | Heterogeneous nuclear ribonucleoproteins C1/C2       | Nucleus                                    |
|                                                                                                     | P06748    | NPM1      | Nucleophosmin                                        | Nucleus, cytoplasm                         |
|                                                                                                     | P0DME0    | SETSIP    | Protein SETSIP                                       | Cytoplasm, nucleus                         |
| RNA binding, translation                                                                            | P50914    | RPL14     | 60S ribosomal protein L14                            | Cytoplasm, membrane                        |
|                                                                                                     | Q02878    | RPL6      | 60S ribosomal protein L6                             | Cytosol, membrane, nucleus                 |
|                                                                                                     | Q8NHW5    | RPLP0P6   | 60S acidic ribosomal protein P0-like                 | Cytosol                                    |
|                                                                                                     | P62263    | RPS14     | 40S ribosomal protein S14                            | Cytosol, cytoplasm, membrane, mitochondria |
|                                                                                                     | P62249    | RPS16     | 40S ribosomal protein S16                            | Cytosol, membrane                          |
|                                                                                                     | P15880    | RPS2      | 40S ribosomal protein S2                             | Cytoplasm, membrane, nucleus               |
|                                                                                                     | P62701    | RPS4X     | 40S ribosomal protein S4, X isoform                  | Cytoplasm                                  |
|                                                                                                     | P62314    | SNRPD1    | Small nuclear ribonucleoprotein Sm D1                |                                            |

|                                                                   |        |               |                                              |                                |
|-------------------------------------------------------------------|--------|---------------|----------------------------------------------|--------------------------------|
| Cytoskeleton remodeling, ECM proteolysis, cell migration          | O43707 | ACTN4         | Alpha-actinin 4                              | Nucleus, cytoplasm             |
|                                                                   | P12110 | COL6A2        | Collagen alpha-2(VI) chain                   | Membrane, secreted             |
|                                                                   | P12259 | F5            | Coagulation factor V                         | Extracellular region           |
|                                                                   | P04406 | GAPDH         | Glyceraldehyde-3-phosphate dehydrogenase     | Cytoplasm, nucleus, membrane   |
|                                                                   | Q06033 | ITIH3         | Inter-alpha-trypsin inhibitor heavy chain H3 | Extracellular region           |
|                                                                   | P35580 | MYH10         | Myosin-10                                    | Extracellular region           |
|                                                                   | P36955 | PEDF/SERPINF1 | Pigment epithelium-derived factor            | Extracellular region           |
|                                                                   | P08670 | VIM           | Vimentin                                     | Cytoplasm                      |
| Metabolism, ion transport, tumour cell proliferation and survival | P53396 | ACLY          | ATP-citrate synthase                         | Cytoplasm                      |
|                                                                   | P02771 | AFP           | Alpha-fetoprotein                            | Cytoplasm, extracellular space |
|                                                                   | P22234 | PAICS         | Multifunctional protein ADE2                 | Cytosol, membrane              |
|                                                                   | P14618 | PKM           | Pyruvate kinase PKM                          | Cytoplasm, nucleus             |

To identify function (as GO-Biological Process), the Universal Protein Resource (UniProt) database was interrogated using the accession number for each of the 38 peptides identified in the analysis as abundant in HiMet EVs (FDR = 0.5%).
